# Supplementary material for: Single-Cell DNA Methylation Analysis of Chicken Lampbrush Chromosomes
Source: MDPI journal article supplement (doi:10.3390/ijms232012601), 2022-10-20
Supplement: s1 [file s1]

**Table S3. Statistics for regions in which oocytes differ from other cell types (excluding sperm).**

| chr_type | state | count | mean     | std      | min | 25%    | 50%  | 75%    | max   |
|----------|-------|-------|----------|----------|-----|--------|------|--------|-------|
| W        | 0     | 16    | 379,9375 | 575,7534 | 22  | 70,75  | 166  | 275    | 1811  |
| Z        | 0     | 1203  | 877,5278 | 823,1441 | 16  | 366,5  | 668  | 1166   | 10789 |
|          | 1     | 67    | 432,8209 | 429,1282 | 11  | 92,5   | 268  | 555    | 1798  |
|          | 2     | 2     | 87,5     | 78,48885 | 32  | 59,75  | 87,5 | 115,25 | 143   |
| inter    | 0     | 1700  | 409,0188 | 438,0252 | 7   | 118,75 | 254  | 526,25 | 3598  |
|          | 1     | 101   | 119,5644 | 114,6837 | 18  | 40     | 77   | 144    | 629   |
|          | 2     | 3     | 37       | 27,73085 | 20  | 21     | 22   | 45,5   | 69    |
| macro    | 0     | 3711  | 439,7141 | 477,7442 | 8   | 135    | 278  | 579,5  | 7975  |
|          | 1     | 216   | 123,9769 | 155,0725 | 7   | 38,75  | 68   | 135,25 | 1038  |
|          | 2     | 5     | 331,8    | 618,8067 | 23  | 25     | 66   | 108    | 1437  |
| micro    | 0     | 2781  | 364,4412 | 411,6798 | 7   | 117    | 233  | 455    | 6135  |
|          | 1     | 182   | 182,0769 | 243,9355 | 11  | 51     | 94,5 | 190,5  | 1581  |
|          | 2     | 6     | 103,5    | 62,73675 | 30  | 60     | 95   | 139    | 199   |
