# Supplementary material for: Single-Cell DNA Methylation Analysis of Chicken Lampbrush Chromosomes
Source: MDPI journal article supplement (doi:10.3390/ijms232012601), 2022-10-20
Supplement: s1 [file s1]

**Table S2. Statistics for HMM State 0 of DNA methylation for different chromosome types.**

|          |       | Methylation |          |          |     |          |          |          |         | Length (in base pairs) for state N |          |          |     |        |     |         |       |
|----------|-------|-------------|----------|----------|-----|----------|----------|----------|---------|------------------------------------|----------|----------|-----|--------|-----|---------|-------|
| chr_type | state | count       | mean     | std      | min | 25%      | 50%      | 75%      | max     | count                              | mean     | std      | min | 25%    | 50% | 75%     | max   |
| W        | 0     | 54          | 3,914458 | 5,091115 | 0   | 0        | 0,940169 | 7,50974  | 17,2414 | 54                                 | 626,3704 | 597,042  | 22  | 189,25 | 417 | 821     | 2278  |
| Z        | 0     | 2872        | 4,686931 | 4,481034 | 0   | 0        | 3,77358  | 7,8125   | 21,0526 | 2872                               | 1007,481 | 1496,063 | 16  | 371,75 | 722 | 1288,25 | 45161 |
| inter    | 0     | 7532        | 4,430319 | 4,264329 | 0   | 0,961538 | 3,15908  | 7,05516  | 33,3333 | 7532                               | 663,314  | 732,9933 | 6   | 162    | 396 | 967     | 9501  |
| macro    | 0     | 16695       | 4,168872 | 4,281295 | 0   | 0,770925 | 2,77778  | 6,54206  | 31,8182 | 16695                              | 702,1552 | 770,2771 | 8   | 177    | 422 | 1008    | 15741 |
| micro    | 0     | 13172       | 4,457402 | 4,157413 | 0   | 1,07527  | 3,26797  | 7,000973 | 24,2424 | 13172                              | 638,0003 | 727,1959 | 6   | 158    | 371 | 894     | 12736 |
