# Supplementary material for: Single-Cell DNA Methylation Analysis of Chicken Lampbrush Chromosomes
Source: MDPI journal article supplement (doi:10.3390/ijms232012601), 2022-10-20
Supplement: s1 [file s1]

**Table S1. Sequencing summary for single-cell libraries.**

| Library | Oocyte stage | Mapped reads (single-end) | CpG covered | CpG methylation, % |
|---------|--------------|---------------------------|-------------|--------------------|
| MS1     | SWF          | 4 233 467                 | 3 745 339   | 57.33              |
| MS2     | SWF          | 4 294 346                 | 4 065 140   | 57.19              |
| MS6     | SWF          | 3 761 381                 | 3 846 393   | 57.39              |
| MS7     | SWF          | 3 917 920                 | 3 765 203   | 57.76              |
| MS8     | SWF          | 3 525 490                 | 3 524 664   | 57.42              |
| MS9     | LWF          | 2 294 949                 | 2 248 514   | 51.69              |
| MS10    | LWF          | 3 537 999                 | 3 022 951   | 50.20              |
| MS11    | LWF          | 4 000 781                 | 2 183 219   | 57.80              |
| MS12    | LWF          | 2 552 973                 | 2 212 127   | 53.35              |
| MS13    | LWF          | 4 277 809                 | 2 889 211   | 51.89              |
| MS14    | LWF          | 2 748 091                 | 2 579 421   | 51.17              |
| MS15    | SWF          | 4 297 209                 | 2 512 089   | 50.82              |
| MS16    | SWF          | 3 571 361                 | 3 310 282   | 50.06              |
| MS17    | LWF          | 4 179 621                 | 3 853 446   | 49.68              |
| MS18    | LWF          | 2 969 772                 | 2 611 373   | 49.98              |
| MS19    | LWF          | 1 502 800                 | 1 505 668   | 49.70              |
