# Supplementary material for: Single-Cell DNA Methylation Analysis of Chicken Lampbrush Chromosomes
Source: Int J Mol Sci. 2022 Oct 20;23(20):12601. doi: 10.3390/ijms232012601 (PMC9604247; doi:10.3390/ijms232012601)
Supplement: Supplementary file 1 [file ijms-23-12601-s001.zip]

Archive with 5 entries (5 files):
- Supplementary_figures.pdf
- Table S1.pdf
- Table S2.pdf
- Table S3.pdf
- Table S4.xlsx
