# Supplementary material for: Single-Cell DNA Methylation Analysis of Chicken Lampbrush Chromosomes
Source: Int J Mol Sci. 2022 Oct 20;23(20):12601. doi: 10.3390/ijms232012601 (PMC9604247; doi:10.3390/ijms232012601)
Supplement: Supplementary file 1 [file ijms-23-12601-s001.zip › Table S4.xlsx]

## Sheet: DMR1
Table S4	Differentially methylated genes identified by HMM
ncbiRefSeq galGal5
chr1	15006671	15072453	gene_id "gene244"	gene_name "LRRK2"
chr1	22096234	22113754	gene_id "gene307"	gene_name "SPAM1"
chr1	33298676	33301273	gene_id "gene422"	gene_name "AVPR1A"
chr1	48800978	48802410	gene_id "gene688"	gene_name "LOC107053841"
chr1	50141099	50202515	gene_id "gene751"	gene_name "TNRC6B"
chr1	50333661	50352599	gene_id "gene754"	gene_name "GRAP2"
chr1	56806320	56827413	gene_id "gene931"	gene_name "SLC37A3"
chr1	84156487	84156569	gene_id "gene1485"	gene_name "TRNAL-CAG"
chr1	133974594	133993258	gene_id "gene2181"	gene_name "IL18R1"
chr1	163235889	163237571	gene_id "gene2429"	gene_name "LOC107051905"
chr1	182444413	182451714	gene_id "gene2698"	gene_name "MMP13"
chr1	194845376	194847022	gene_id "gene2909"	gene_name "LOC107052466"
chr2	398472	400482	gene_id "gene3381"	gene_name "LRRC61"
chr2	4075462	4084282	gene_id "gene3480"	gene_name "MYO1G"
chr2	32646345	32661345	gene_id "gene3862"	gene_name "HOXA3"
chr2	38055639	38074985	gene_id "gene3927"	gene_name "NGLY1"
chr2	38075149	38081681	gene_id "gene3928"	gene_name "OXSM"
chr2	62919298	62972619	gene_id "gene4283"	gene_name "HIVEP1"
chr2	63231466	63325840	gene_id "gene4289"	gene_name "NEDD9"
chr2	98303216	98308122	gene_id "gene4641"	gene_name "MOG"
chr2	129153458	129170044	gene_id "gene5061"	gene_name "ANKRD46"
chr2	138427693	138427774	gene_id "gene5155"	gene_name "TRNAS-GCU"
chr3	3543729	3545530	gene_id "gene5643"	gene_name "NKX2-4"
chr3	3796470	3796571	gene_id "gene5648"	gene_name "MIR1740"
chr3	16407588	16425142	gene_id "gene5864"	gene_name "NINL"
chr3	21851988	21855380	gene_id "gene5980"	gene_name "LOC107052975"
chr3	21872436	21879413	gene_id "gene5981"	gene_name "ATF3"
chr3	30380678	30381472	gene_id "gene6125"	gene_name "LOC100858253"
chr3	38552865	38572305	gene_id "gene6265"	gene_name "LOC101748561"
chr3	57432141	57467849	gene_id "gene6553"	gene_name "ENPP3"
chr3	62944948	62955171	gene_id "gene6624"	gene_name "ASF1A"
chr3	66718751	66725648	gene_id "gene6684"	gene_name "DDO"
chr3	68647718	68654843	gene_id "gene6727"	gene_name "LOC101751005"
chr3	77478397	77478479	gene_id "gene6813"	gene_name "TRNAL-CAG"
chr3	77511454	77533879	gene_id "gene6814"	gene_name "TBX18"
chr3	81087946	81188410	gene_id "gene6861"	gene_name "COL12A1"
chr3	88468813	88497289	gene_id "gene6925"	gene_name "LOC421892"
chr3	101471165	101479312	gene_id "gene7054"	gene_name "OSR1"
chr3	102034643	102081828	gene_id "gene7064"	gene_name "PUM2"
chr3	105002952	105008594	gene_id "gene7126"	gene_name "LOC776992"
chr4	501159	523698	gene_id "gene7482"	gene_name "OPHN1"
chr4	2272559	2278424	gene_id "gene7597"	gene_name "ITGB1BP2"
chr4	4259390	4289963	gene_id "gene7664"	gene_name "MAP7D3"
chr4	14246979	14254321	gene_id "gene7843"	gene_name "RAB39B"
chr4	34620335	34631074	gene_id "gene8131"	gene_name "MFSD8"
chr4	34630992	34653703	gene_id "gene8132"	gene_name "C4H4ORF29"
chr4	35018682	35023622	gene_id "gene8151"	gene_name "LOC107051769"
chr4	35192682	35212102	gene_id "gene8152"	gene_name "MRPL1"
chr4	40160051	40247993	gene_id "gene8227"	gene_name "WWC2"
chr4	40247892	40249457	gene_id "gene8228"	gene_name "DCTD"
chr4	46742336	46743645	gene_id "gene8321"	gene_name "PLACL2"
chr4	51207193	51228672	gene_id "gene8402"	gene_name "RASSF6"
chr4	54023891	54036345	gene_id "gene8437"	gene_name "LOC107051715"
chr4	65835647	65849131	gene_id "gene8621"	gene_name "LOC100857440"
chr4	77137369	77142771	gene_id "gene8765"	gene_name "LOC107053291"
chr4	85208881	85214296	gene_id "gene8889"	gene_name "LOC101749862"
chr4	88440625	88447888	gene_id "gene8954"	gene_name "LOC101748980"
chr4	89311683	89320604	gene_id "gene8970"	gene_name "DDRGK1"
chr4	89674974	89675056	gene_id "gene8980"	gene_name "TRNAL-CAG"
chr5	223287	225205	gene_id "gene9248"	gene_name "TMEM258"
chr5	225267	227950	gene_id "gene9249"	gene_name "FEN1"
chr5	877310	877391	gene_id "gene9306"	gene_name "TRNAS-GCU"
chr5	7450878	7488635	gene_id "gene9423"	gene_name "FAR1"
chr5	7560351	7585091	gene_id "gene9426"	gene_name "ARNTL"
chr5	11278336	11399981	gene_id "gene9491"	gene_name "LOC107053388"
chr5	14094422	14098755	gene_id "gene9555"	gene_name "TNNI2"
chr5	19185009	19186815	gene_id "gene9714"	gene_name "FJX1"
chr5	23637112	23648212	gene_id "gene9782"	gene_name "CHRM4"
chr5	27578513	27715375	gene_id "gene9888"	gene_name "SLC8A3"
chr5	50785006	50885066	gene_id "gene10292"	gene_name "KIF26A"
chr5	53235710	53235792	gene_id "gene10343"	gene_name "TRNAL-CAG"
chr5	54123011	54213690	gene_id "gene10369"	gene_name "RP11-47I22.4"
chr6	634391	666759	gene_id "gene10642"	gene_name "PHYHIPL"
chr6	2633731	2663946	gene_id "gene10663"	gene_name "GLUD1"
chr6	3433450	3826971	gene_id "gene10683"	gene_name "NRG3"
chr6	11524822	11526449	gene_id "gene10849"	gene_name "EIF4EBP2"
chr6	19789740	19825572	gene_id "gene11010"	gene_name "HECTD2"
chr6	22814934	22816454	gene_id "gene11115"	gene_name "LOC107053696"
chr7	243200	243282	gene_id "gene11464"	gene_name "TRNAL-CAG"
chr7	258708	296989	gene_id "gene11465"	gene_name "PMS1"
chr7	4224078	4224160	gene_id "gene11512"	gene_name "TRNAL-CAG"
chr7	4776473	4792662	gene_id "gene11527"	gene_name "MLPH"
chr7	6823544	6823625	gene_id "gene11583"	gene_name "TRNAS-GCU"
chr7	8226217	8335805	gene_id "gene11616"	gene_name "TMEFF2"
chr7	11982759	12011447	gene_id "gene11671"	gene_name "FAM117B"
chr7	15472281	15482136	gene_id "gene11731"	gene_name "DFNB59"
chr7	16332603	16334263	gene_id "gene11745"	gene_name "LOC107053814"
chr7	19149372	19265188	gene_id "gene11828"	gene_name "STK39"
chr7	20583219	20583878	gene_id "gene11848"	gene_name "LOC107053823"
chr7	20583699	20684258	gene_id "gene11849"	gene_name "FIGN"
chr7	22205617	22211627	gene_id "gene11881"	gene_name "ASIC4"
chr7	32804865	32805961	gene_id "gene12079"	gene_name "LOC107053856"
chr7	32805980	32863556	gene_id "gene12080"	gene_name "KYNU"
chr7	33572495	33572517	gene_id "gene12085"	gene_name "MIR7473"
chr8	3693078	3700186	gene_id "gene12286"	gene_name "RGS5"
chr8	4318344	4327373	gene_id "gene12317"	gene_name "FAM78B"
chr8	8236272	8260704	gene_id "gene12453"	gene_name "LOC768392"
chr8	8260737	8466117	gene_id "gene12454"	gene_name "BRINP3"
chr8	12054598	12056085	gene_id "gene12503"	gene_name "HOXA3"
chr8	19598866	19627575	gene_id "gene12636"	gene_name "LOC107054066"
chr8	20485365	20488846	gene_id "gene12667"	gene_name "KLF-4"
chr8	21974745	21977491	gene_id "gene12736"	gene_name "LOC424620"
chr9	2537881	2540886	gene_id "gene13067"	gene_name "LOC101748009"
chr9	4190002	4195467	gene_id "gene13106"	gene_name "LOC107051866"
chr9	5274561	5279152	gene_id "gene13177"	gene_name "LOC107051858"
chr9	12448872	12485514	gene_id "gene13298"	gene_name "NCBP2"
chr9	12942740	12945131	gene_id "gene13317"	gene_name "CPN2"
chr9	22569500	22583712	gene_id "gene13561"	gene_name "MLF1"
chr10	557546	561120	gene_id "gene13676"	gene_name "LOC100857180"
chr10	2942674	2964381	gene_id "gene13819"	gene_name "LOC101747496"
chr10	3287606	3288430	gene_id "gene13824"	gene_name "LOC107052134"
chr10	10921839	11055102	gene_id "gene13996"	gene_name "PDE8A"
chr10	13042935	13046872	gene_id "gene14055"	gene_name "HAPLN3"
chr11	568454	572781	gene_id "gene14334"	gene_name "UMOD"
chr11	825327	825409	gene_id "gene14358"	gene_name "TRNAL-CAG"
chr11	831860	836141	gene_id "gene14360"	gene_name "CX3CL1"
chr13	3961763	4122652	gene_id "gene15487"	gene_name "DOCK2"
chr13	8437920	8440043	gene_id "gene15545"	gene_name "LOC107054511"
chr13	10437744	10441242	gene_id "gene15628"	gene_name "THOC3"
chr13	13508803	13512859	gene_id "gene15721"	gene_name "LTC4S"
chr14	764296	764378	gene_id "gene15988"	gene_name "MIR193B"
chr14	12160643	12161477	gene_id "gene16342"	gene_name "HBAD"
chr14	12163648	12164434	gene_id "gene16343"	gene_name "HBAA"
chr15	783758	784354	gene_id "gene16603"	gene_name "GP1BB"
chr15	6629924	6647601	gene_id "gene16767"	gene_name "SSH1"
chr15	6894013	6901168	gene_id "gene16783"	gene_name "TRPV4"
chr15	7214058	7219799	gene_id "gene16803"	gene_name "TPST2"
chr16	163794	168330	gene_id "gene17091"	gene_name "TRIM27.1"
chr18	1994918	2012417	gene_id "gene17698"	gene_name "PIK3R6"
chr18	6662278	6664427	gene_id "gene17846"	gene_name "LOC107052238"
chr18	6961443	6961566	gene_id "gene17862"	gene_name "MIR3064"
chr18	7976626	7997687	gene_id "gene17894"	gene_name "ABCA8"
chr18	10198827	10209946	gene_id "gene17997"	gene_name "LOC769329"
chr18	10969972	10971635	gene_id "gene18056"	gene_name "MCHR1"
chr19	5863191	5863275	gene_id "gene18325"	gene_name "MIR144"
chr20	8514510	8519639	gene_id "gene18793"	gene_name "MRGBP"
chr20	9736237	9752347	gene_id "gene18844"	gene_name "TPD52L2"
chr20	9955221	9958703	gene_id "gene18857"	gene_name "C20H20ORF195"
chr20	11089447	11097266	gene_id "gene18964"	gene_name "TUBB1"
chr20	11755885	11758597	gene_id "gene18984"	gene_name "LOC107054839"
chr20	12546220	12557725	gene_id "gene19007"	gene_name "LOC107054836"
chr21	554290	560757	gene_id "gene19172"	gene_name "ZBTB48"
chr21	560932	566180	gene_id "gene19173"	gene_name "TAS1R1"
chr21	618623	623388	gene_id "gene19182"	gene_name "RNF207"
chr21	1349510	1363470	gene_id "gene19204"	gene_name "TTC34"
chr21	6125923	6165850	gene_id "gene19418"	gene_name "EPHA8"
chr22	355672	413768	gene_id "gene19500"	gene_name "SLC23A2"
chr22	1169897	1172575	gene_id "gene19522"	gene_name "NKX2-6"
chr23	540185	559924	gene_id "gene19725"	gene_name "NKAIN1"
chr23	1305515	1310265	gene_id "gene19738"	gene_name "LOC107055005"
chr23	1544454	1553598	gene_id "gene19751"	gene_name "PTAFR"
chr23	2382455	2393036	gene_id "gene19809"	gene_name "RHCE"
chr23	2553205	2556038	gene_id "gene19818"	gene_name "LOC107055018"
chr23	3235334	3240172	gene_id "gene19838"	gene_name "PAFAH2"
chr25	1080919	1087221	gene_id "gene20350"	gene_name "LOC100857468"
chr25	1266694	1272789	gene_id "gene20374"	gene_name "LOC100857714"
chr25	1557855	1582946	gene_id "gene20403"	gene_name "MEF2D"
chr25	2567666	2590029	gene_id "gene20540"	gene_name "FCER1G"
chr25	2809804	2809913	gene_id "gene20572"	gene_name "MIR6620"
chr26	182407	185333	gene_id "gene20666"	gene_name "LOC771161"
chr26	1470656	1481105	gene_id "gene20757"	gene_name "LOC107055207"
chr26	1671908	1703852	gene_id "gene20776"	gene_name "SOX13"
chr26	2652733	2657102	gene_id "gene20834"	gene_name "CD55"
chr26	4690003	4698367	gene_id "gene20936"	gene_name "LOC107055182"
chr26	4698990	4704077	gene_id "gene20937"	gene_name "TSPO2"
chr26	4741376	4747859	gene_id "gene20944"	gene_name "TREM-B1"
chr27	390237	392841	gene_id "gene21019"	gene_name "LOC107055221"
chr27	1428036	1435489	gene_id "gene21127"	gene_name "GJC1"
chr27	2603781	2603862	gene_id "gene21179"	gene_name "TRNAS-GCU"
chr27	4029274	4049551	gene_id "gene21254"	gene_name "KPNB1"
chr27	4120634	4160530	gene_id "gene21259"	gene_name "LOC101752206"
chr27	4374478	4403841	gene_id "gene21278"	gene_name "MLLT6"
chr27	5069166	5069814	gene_id "gene21368"	gene_name "LOC396365"
chr27	5297863	5306627	gene_id "gene21394"	gene_name "STAT5B"
chr28	790661	796184	gene_id "gene21541"	gene_name "BTN1A1"
chr28	891336	894010	gene_id "gene21551"	gene_name "POLE4"
chr28	895314	900558	gene_id "gene21552"	gene_name "PRAM1"
chr28	1270887	1272972	gene_id "gene21586"	gene_name "CTSG"
chr28	1274366	1278772	gene_id "gene21587"	gene_name "S1PR4"
chr28	1295558	1326315	gene_id "gene21590"	gene_name "CELF5"
chr28	2246985	2247058	gene_id "gene21660"	gene_name "MIR211"
chr28	2280564	2280670	gene_id "gene21662"	gene_name "MIR1647"
chr28	3296027	3317374	gene_id "gene21746"	gene_name "LOC107055350"
chr28	4490505	4492811	gene_id "gene21859"	gene_name "LOC107055380"
chrZ	1278266	1354612	gene_id "gene22418"	gene_name "CTIF"
chrZ	2160720	2176234	gene_id "gene22435"	gene_name "PSTPIP2"
chrZ	7161338	7165419	gene_id "gene22455"	gene_name "PINLYP"
chrZ	10904842	10916829	gene_id "gene22577"	gene_name "CAPSL"
chrZ	13639705	13656342	gene_id "gene22615"	gene_name "NIM1K"
chrZ	22221557	22227141	gene_id "gene22729"	gene_name "LOC427180"
chrZ	23491688	23495814	gene_id "gene22753"	gene_name "F2RL2"
chrZ	23841913	23867687	gene_id "gene22756"	gene_name "ANKDD1B"
chrZ	25181697	25213735	gene_id "gene22788"	gene_name "ZNF366"
chrZ	26043361	26048510	gene_id "gene22804"	gene_name "DMRT2"
chrZ	35070889	35075899	gene_id "gene22940"	gene_name "LOC107052316"
chrZ	36543163	36676401	gene_id "gene22953"	gene_name "RORB"
chrZ	40076888	40095396	gene_id "gene22987"	gene_name "HNRNPK"
chrZ	46726619	46756565	gene_id "gene23079"	gene_name "WDR36"
chrZ	47672706	47677024	gene_id "gene23086"	gene_name "LOC101749818"
chrZ	51958739	51993024	gene_id "gene23112"	gene_name "RNF38"
chrZ	52003922	52011357	gene_id "gene23114"	gene_name "TRIM14"
chrZ	66519574	66537297	gene_id "gene23325"	gene_name "LOC107052410"
chrZ	70479834	70507823	gene_id "gene23385"	gene_name "CORO2A"
